# Supplementary material for: Out‐of‐Pocket Annual Health Expenditures and Financial Toxicity From Healthcare Costs in Patients With Heart Failure in the United States
Source: PubMed Central journal article supplement — J Am Heart Assoc. 2021 Jul 6;10(14):e022164. doi: 10.1161/JAHA.121.022164 (PMC8483501; doi:10.1161/jaha.121.022164), 2021-07-06

# **Supplemental Material**

**Table S1. CCS, ICD-9 and ICD-10 codes for risk factors and comorbidities.**

| Comorbidity                            | CCS codes | ICD-9 Codes or CCS codes         | ICD-10 Codes                                          |
|----------------------------------------|-----------|----------------------------------|-------------------------------------------------------|
| Hypertension                           | NA        | 401                              | I10                                                   |
| Diabetes                               | NA        | 250                              | E11                                                   |
| Dyslipidemia                           | NA        | 272                              | E78                                                   |
| Atherosclerotic Cardiovascular Disease | NA        | 410, 413, 414, 433-437, 440, 443 | I20, I21, I25, I63, G45, I70, I73, I79                |
| Arthritis                              | 202, 203  | NA                               | M16, M17, M19                                         |
| Cancer                                 | 11-43     | NA                               | C34, C53, C55, C56, C61, C64, C71, C76, C80, C85, C95 |
| Asthma                                 | 128       | NA                               | J45                                                   |
| Hepatitis                              | 6         | NA                               | B19                                                   |
| Chronic Kidney Disease                 | 128       | NA                               | N18                                                   |
| Chronic Obstructive Pulmonary disease  | 127       | NA                               | J42, J43, J44                                         |

CCS, clinical classification software; ICD, international classification of diseases

**Table S2. Costliest categories among families with 1 or more members with HF, stratified by income level and insurance status, from the MEPS 2014-2018.**

| Characteristic               | Out of pocket healthcare costs |              |                            |             |              |              |           |              |
|------------------------------|--------------------------------|--------------|----------------------------|-------------|--------------|--------------|-----------|--------------|
|                              | OOP expenditures               | Premiums     | Total Health Services Cost | Inpatient   | Outpatient   | Medication   | Emergency | Other        |
| Overall, % (95% CI)          | NA                             | 32 (28 – 37) | NA                         | 4 (2 – 6)   | 12 (9 – 15)  | 36 (32 – 41) | 0 (0 – 2) | 15 (12 – 18) |
| Family Income, % (95% CI)    |                                |              |                            |             |              |              |           |              |
| Low                          | NA                             | 13 (10 – 18) | NA                         | 5 (2 – 8)   | 14 (10 – 19) | 50 (43 – 57) | 1 (0 – 3) | 18 (13 – 24) |
| Middle/High                  | NA                             | 43 (37 – 50) | NA                         | 4 (2 – 7)   | 11 (8 – 16)  | 28 (23 – 34) | 0 (0 – 2) | 14 (10 – 18) |
| Insurance Status, % (95% CI) |                                |              |                            |             |              |              |           |              |
| Private                      | NA                             | 50 (44 – 57) | NA                         | 4 (2 – 9)   | 11 (7 – 16)  | 22 (17 – 28) | 0 (0 – 3) | 13 (9 – 18)  |
| Public                       | NA                             | 13 (9 – 19)  | NA                         | 4 (2 – 6)   | 14 (10 – 19) | 51 (44 – 58) | 1 (0 – 3) | 17 (13 – 23) |
| Uninsured                    | NA                             | 21 (5 – 58)  | NA                         | 22 (5 – 58) | 1 (0 – 9)    | 37 (13 – 71) | 0 (0 – 0) | 19 (4 – 56)  |

HF, heart failure; MEPS, Medical expenditure panel survey

**Figure S1. Employment Status of persons with heart failure.**

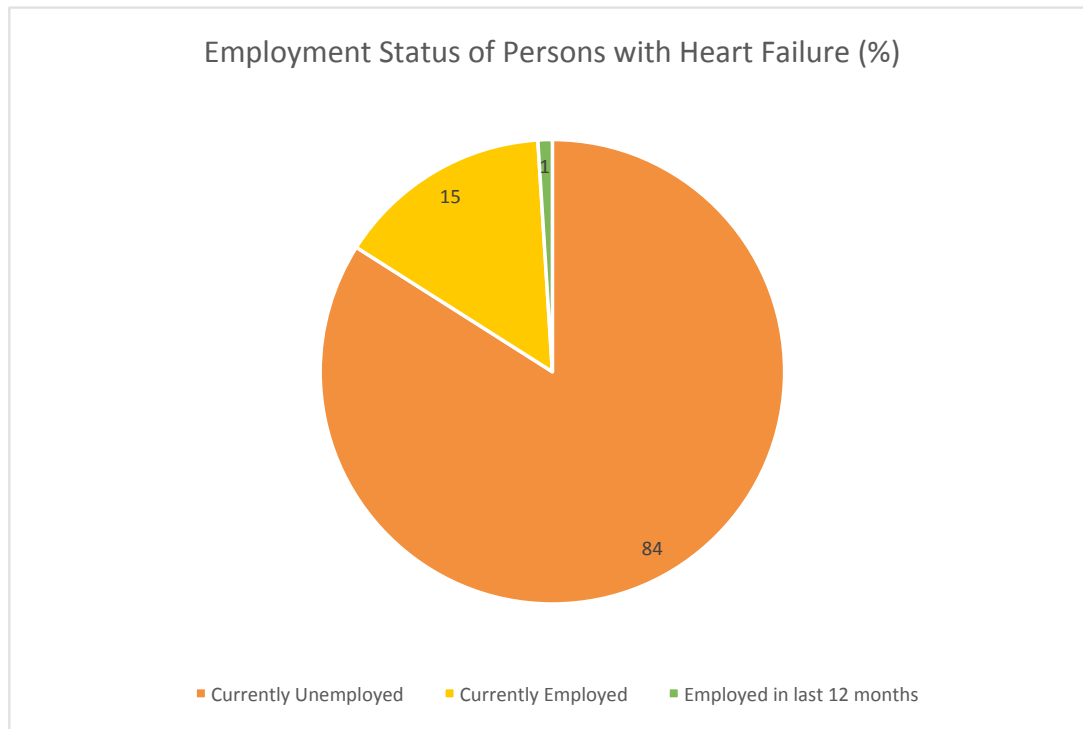

Supplement: JAH3-10-e022164-s001.pdf [file JAH3-10-e022164-s001.pdf]
